# Supplementary material
Source: Springer Nature journal article supplement (https://www.springermedizin.de/resource/supplementary/12879_2012_1924_MOESM1_ESM.pdf/9443362)
Supplement: MOESM1 [file 9443362]

day 0  
day 1, 3, 5, 7  
day 8-27  
day 28  
6 month  
12 month

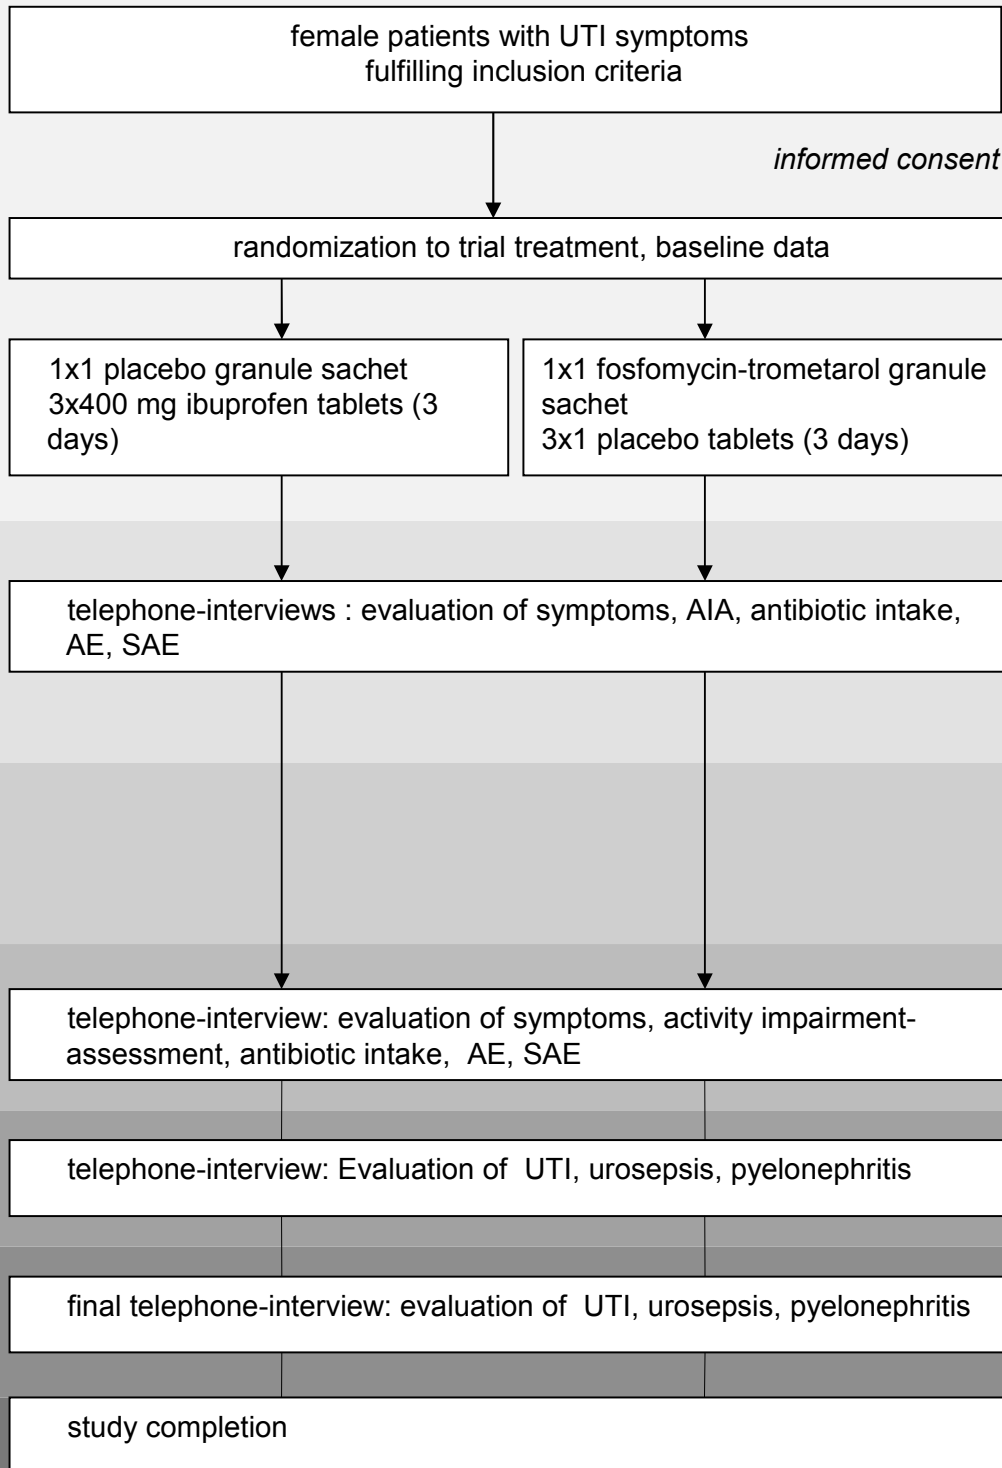

female patients with UTI symptoms  
fulfilling inclusion criteria

*informed consent*

randomization to trial treatment, baseline data

1x1 placebo granule sachet  
3x400 mg ibuprofen tablets (3 days)

1x1 fosfomycin-trometamol granule sachet  
3x1 placebo tablets (3 days)

telephone-interviews : evaluation of symptoms, AIA, antibiotic intake,  
AE, SAE

telephone-interview: evaluation of symptoms, activity impairment-  
assessment, antibiotic intake, AE, SAE

telephone-interview: Evaluation of UTI, urosepsis, pyelonephritis

final telephone-interview: evaluation of UTI, urosepsis, pyelonephritis

study completion
